# Supplementary material for: Liability-scale heritability estimation for biobank studies of low-prevalence disease
Source: PubMed Central journal article supplement — Am J Hum Genet. 2022 Oct 19;109(11):2009–17. doi: 10.1016/j.ajhg.2022.09.011 (PMC9674948; doi:10.1016/j.ajhg.2022.09.011), 2022-10-19
Supplement: mmc1.pdf [file mmc1.pdf]

**The American Journal of Human Genetics, Volume 109**

**Supplemental information**

**Liability-scale heritability estimation for biobank  
studies of low-prevalence disease**

**Sven E. Ojavee, Zoltan Kutalik, and Matthew R. Robinson**

## Supplementary Information

### Derivation of the error variance term

Suppose that the genetic value (of an individual)  $g$  and error term  $e$  are from normal distributions  $g \sim N(0, h_l^2)$  and  $e \sim N(0, 1 - h_l^2)$ , where  $h_l^2$  is the underlying liability scale heritability. Then the underlying liability  $l = g + e$  and the binary trait  $y$  with a prevalence of  $K$  is defined as

$$y = \begin{cases} 0, & \text{if } l < \Phi^{-1}(1 - K) \\ 1, & \text{if } l \geq \Phi^{-1}(1 - K) \end{cases} \quad (1)$$

From this we will derive the error variance term  $E(\text{Var}(y|c + zg))$  where  $c$  is some constant and  $z$  is the standard Gaussian density evaluated at  $\Phi^{-1}(1 - K)$  as shown in [?]. As  $c + zg$  is a linear combination of  $g$  we can equivalently find  $E(\text{Var}(y|g))$ . First, we note the conditional distribution of  $y$  given  $g$

$$P(y|g) \begin{array}{c|c} & 0 \\ \hline & P\left(\frac{e}{\sqrt{1-h_l^2}} < \frac{\Phi^{-1}(1-K)-g}{\sqrt{1-h_l^2}}\right) = \\ & \Phi\left(\frac{\Phi^{-1}(1-K)-g}{\sqrt{1-h_l^2}}\right) \\ \hline & 1 \\ \hline & P\left(\frac{e}{\sqrt{1-h_l^2}} \geq \frac{\Phi^{-1}(1-K)-g}{\sqrt{1-h_l^2}}\right) = \\ & \Phi\left(\frac{g-\Phi^{-1}(1-K)}{\sqrt{1-h_l^2}}\right) \end{array} \quad (2)$$

As  $y$  can be equal to only 0 or 1, we can write

$$\begin{aligned} \text{Var}(y|g) &= E(y^2|g) - E(y|g)^2 = E(y|g) - E(y|g)^2 = P(y = 1|g) - P(y = 1|g)^2 = \\ & \Phi\left(\frac{g - \Phi^{-1}(1 - K)}{\sqrt{1 - h_l^2}}\right) - \Phi\left(\frac{g - \Phi^{-1}(1 - K)}{\sqrt{1 - h_l^2}}\right)^2. \end{aligned} \quad (3)$$

To find  $E(\text{Var}(y|g))$  we need to find  $E\left(\Phi\left(\frac{g - \Phi^{-1}(1 - K)}{\sqrt{1 - h_l^2}}\right)\right)$  and  $E\left(\Phi\left(\frac{g - \Phi^{-1}(1 - K)}{\sqrt{1 - h_l^2}}\right)^2\right)$ . For this, we use auxiliary standardised Gaussian random variables  $X$ ,  $X_1$  and  $X_2$  that are independent of  $g$  and  $X_1$  is independent of  $X_2$ . From this it follows that  $\text{Var}(X\sqrt{1 - h_l^2} - g) = 1$  and using the law of total probability we get

$$\begin{aligned} E\left(\Phi\left(\frac{g - \Phi^{-1}(1 - K)}{\sqrt{1 - h_l^2}}\right)\right) &= P\left(X \leq \frac{g - \Phi^{-1}(1 - K)}{\sqrt{1 - h_l^2}}\right) = P(X\sqrt{1 - h_l^2} - g \leq -\Phi^{-1}(1 - K)) = \\ & \Phi(-\Phi^{-1}(1 - K)) = 1 - \Phi(\Phi^{-1}(1 - K)) = K. \end{aligned} \quad (4)$$

Secondly, we see that we can analogously use  $X_1$  and  $X_2$  to find the second moment of  $\Phi\left(\frac{g - \Phi^{-1}(1 - K)}{\sqrt{1 - h_l^2}}\right)$ . For this we need to find the following correlation

$$\text{cor}(X_1\sqrt{1 - h_l^2} - g, X_2\sqrt{1 - h_l^2} - g) = E((X_1\sqrt{1 - h_l^2} - g)(X_2\sqrt{1 - h_l^2} - g)) = E(g^2) = h_l^2. \quad (5)$$

Now we express the expectation using a cumulative distribution function of a bivariate Gaussian distribution of two random variables that have a correlation of  $h_l^2$

$$\begin{aligned}
E\left(\Phi\left(\frac{g - \Phi^{-1}(1-K)}{\sqrt{1-h_l^2}}\right)^2\right) &= E\left(P\left(X_1 \leq \frac{g - \Phi^{-1}(1-K)}{\sqrt{1-h_l^2}}\right)P\left(X_2 \leq \frac{g - \Phi^{-1}(1-K)}{\sqrt{1-h_l^2}}\right)\right) = \\
E\left(P\left(X_1 \leq \frac{g - \Phi^{-1}(1-K)}{\sqrt{1-h_l^2}}, X_2 \leq \frac{g - \Phi^{-1}(1-K)}{\sqrt{1-h_l^2}}\right)\right) &= P\left(X_1 \leq \frac{g - \Phi^{-1}(1-K)}{\sqrt{1-h_l^2}}, X_2 \leq \frac{g - \Phi^{-1}(1-K)}{\sqrt{1-h_l^2}}\right) \\
P\left(X_1\sqrt{1-h_l^2} - g \leq -\Phi^{-1}(1-K), X_2\sqrt{1-h_l^2} - g \leq -\Phi^{-1}(1-K)\right) &= \\
\tilde{\Phi}\left(-\Phi^{-1}(1-K), -\Phi^{-1}(1-K), h_l^2\right) &= \tilde{\Phi}\left(\Phi^{-1}(K), \Phi^{-1}(K), h_l^2\right), \quad (6)
\end{aligned}$$

where  $\tilde{\Phi}(x_1, x_2, \rho)$  is the cumulative distribution function of a standardised bivariate Gaussian distribution with a correlation of  $\rho$ . The first equation follows from the definition of cumulative distribution function, second from the independence of  $X_1$  and  $X_2$ , third from the law of total probability. Thus, by combining the two last results, we get the final expression for the error variance

$$E(\text{Var}(y|c + zg)) = K - \tilde{\Phi}(\Phi^{-1}(K), \Phi^{-1}(K), h_l^2). \quad (7)$$
